# Supplementary material for: Myosin light chain kinase (MYLK) coding polymorphisms modulate human lung endothelial cell barrier responses via altered tyrosine phosphorylation, spatial localization, and lamellipodial protrusions
Source: PubMed Central journal article supplement — Pulm Circ. 2018 Feb 26;8(2):2045894018764171. doi: 10.1177/2045894018764171 (PMC5846938; doi:10.1177/2045894018764171), 2018-02-26

**Supplementary Table S1. Protrusion kymography dynamics in response to S1P in ECs transfected with nmMLCK2.**

| nmMLCK2 Variants           | WT-nmMLCK2  | S147P-nmMLCK2 | 3SNP-nmMLCK2   |
|----------------------------|-------------|---------------|----------------|
| Speed (nm/s)               | 50.7 ± 5.32 | 70.0 ± 5.93 * | 43.0 ± 5.16 *# |
| Distance (nm)              | 3804 ± 437  | 2412 ± 242 *  | 2197 ± 224 *   |
| Time to Max Distance (sec) | 90.7 ± 11.7 | 37.1 ± 5.04 * | 57.4 ± 10.4 *# |

\*, p<0.05 compared to WT-nmMLCK2 transfected cells. #, p<0.05 compared to S147P-nmMLCK2. n=20-30.

**Supplementary Figure S1. MLC phosphorylation and cellular localization upon S1P challenge.** Human pulmonary microvascular ECs were transfected with EGFP-nmMLCK1 constructs with wild type or 3SNP. Then ECs were challenged with S1P (1 μM) for 2-30 min. Immunofluorescence assays were performed to visualize MLC phosphorylation (green), and F-actin (red). These representative images were selected from more than 5 independent assays.

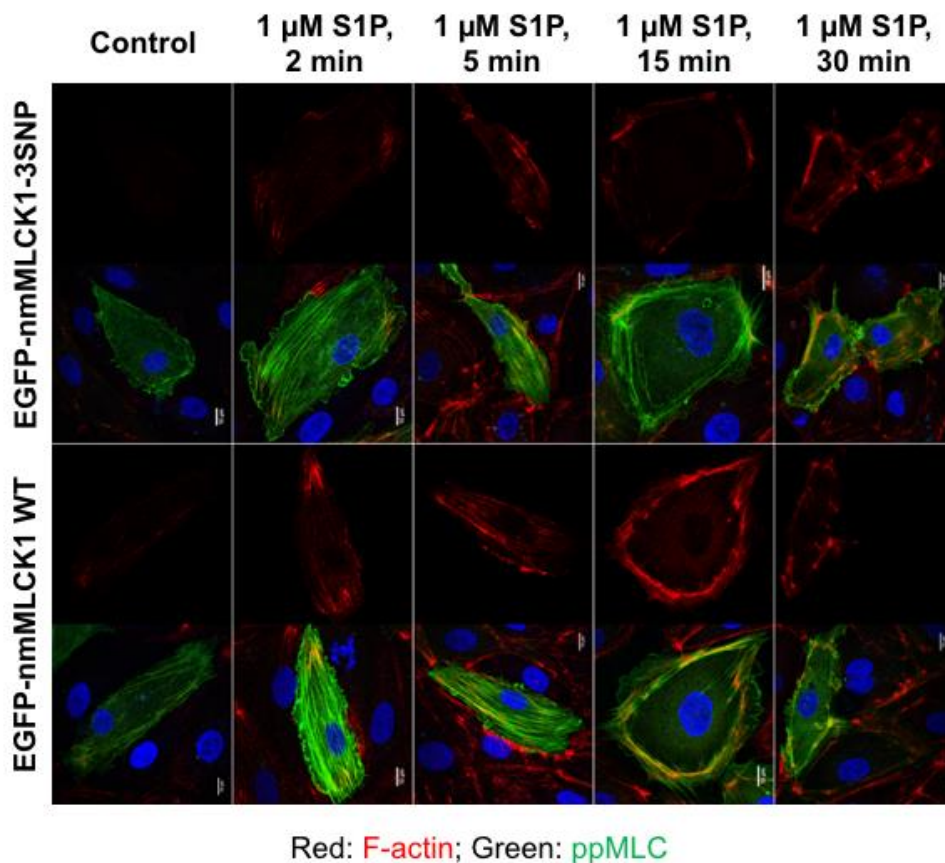

**Supplementary Figure S2. Kymographs of EGFP-nmMLCK2 transfected cells.** Representative kymographs of EGFP-labelled nmMLCK2 (WT or mutated) in cortical regions from SIP-treated cells.

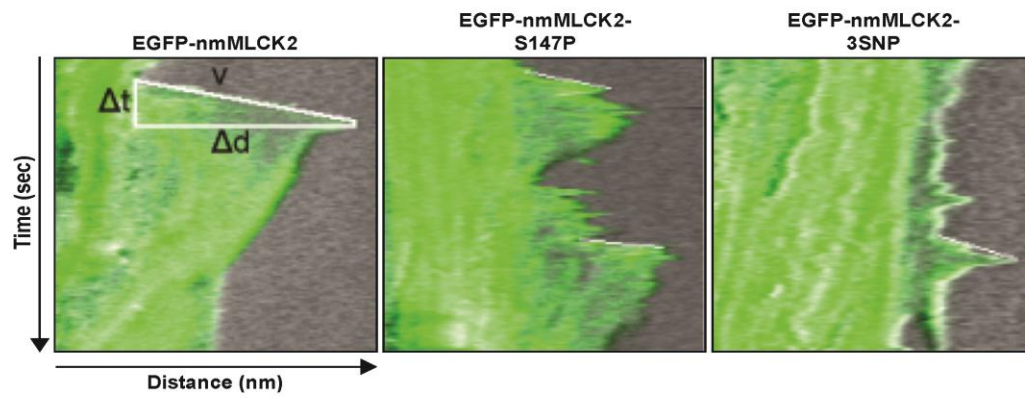

Supplement: Supplemental_material.pdf [file Supplemental_material.pdf]
